# Supplementary material for: Mesoporous silica microcapsule-supported Ag nanoparticles fabricated via nano-assembly and its antibacterial properties
Source: Royal Society of Chemistry journal article supplement (doi:10.1039/c2jm35621j), 2012-01-01
Supplement: c2jm35621j.pdf [file c2jm35621j.pdf]

## Electronic Supplementary Information

### Mesoporous silica microcapsule-supported Ag nanoparticles fabricated via nano-assembly and its antibacterial properties

Hui Yang,<sup>a,b</sup> Yan Liu,<sup>a</sup> Qianhong Shen,<sup>\*a,b</sup> Liangfu Chen,<sup>a</sup> Wenhui You,<sup>a</sup> Xinmin Wang,<sup>b</sup> and Jiansong Sheng<sup>b</sup>

<sup>a</sup> State Key Laboratory of Silicon Materials, Department of Materials Science & Engineering, Zhejiang University, Hangzhou 310027, P.R. China.

<sup>b</sup> Zhejiang California International NanoSystems Institute, Zhejiang University, Hangzhou 310027, P.R. China.

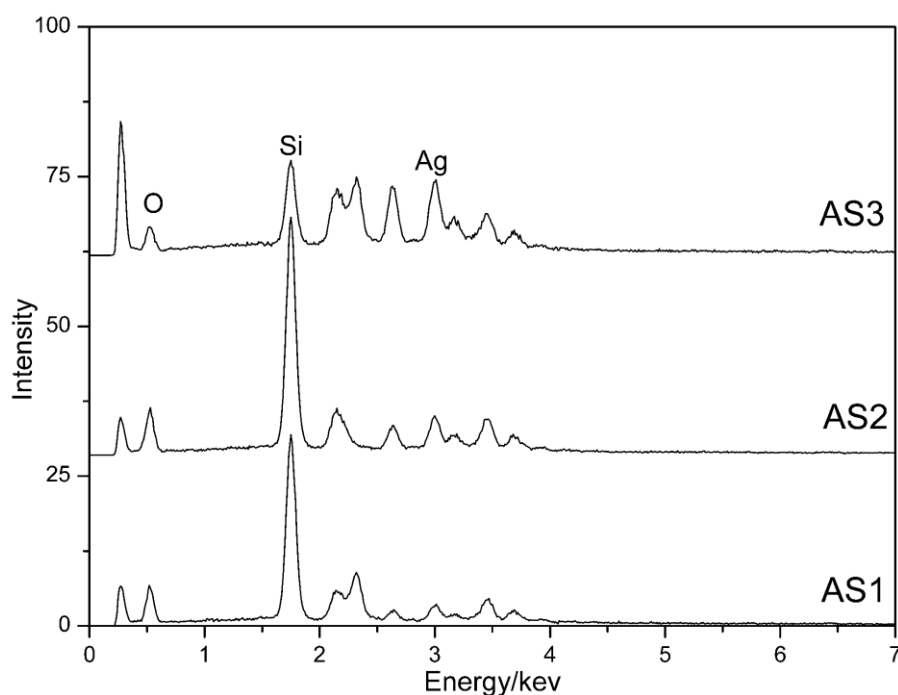

**Fig.S1** Patterns of EDS element analysis of AgNPs@silica microcapsule with different concentration of AgNO<sub>3</sub> in sample AS1, AS2, AS3.

**Table S1** Mass concentration and atomic percent of O, Si, Ag elements in different samples of AgNPs@silica microcapsule (AS1-AS3) with diverse AgNO<sub>3</sub> concentration measured by EDS, and their antibacterial rate on E.coli.

|                                       | AS1    | AS2   | AS3    |
|---------------------------------------|--------|-------|--------|
| C <sub>AgNO<sub>3</sub></sub> (mol/L) | 0.05   | 0.075 | 0.1    |
| O K (Wt%)                             | 40.38  | 37.01 | 33.25  |
| Si K (Wt%)                            | 45.95  | 42.64 | 22.07  |
| Ag L (Wt%)                            | 13.67  | 20.34 | 44.67  |
| O K (At%)                             | 58.88  | 57.54 | 63.40  |
| Si K (At%)                            | 38.16  | 37.77 | 23.97  |
| Ag L (At%)                            | 2.96   | 04.69 | 12.63  |
| Antibacterial rate on E.coli          | 94.38% | 99.8% | 99.95% |
